# Supplementary material
Source: PubMed Central journal article supplement (PMC3306606)
Supplement: NIHMS351778-supplement-Supp_Material.pdf [file NIHMS351778-supplement-Supp_Material.pdf]

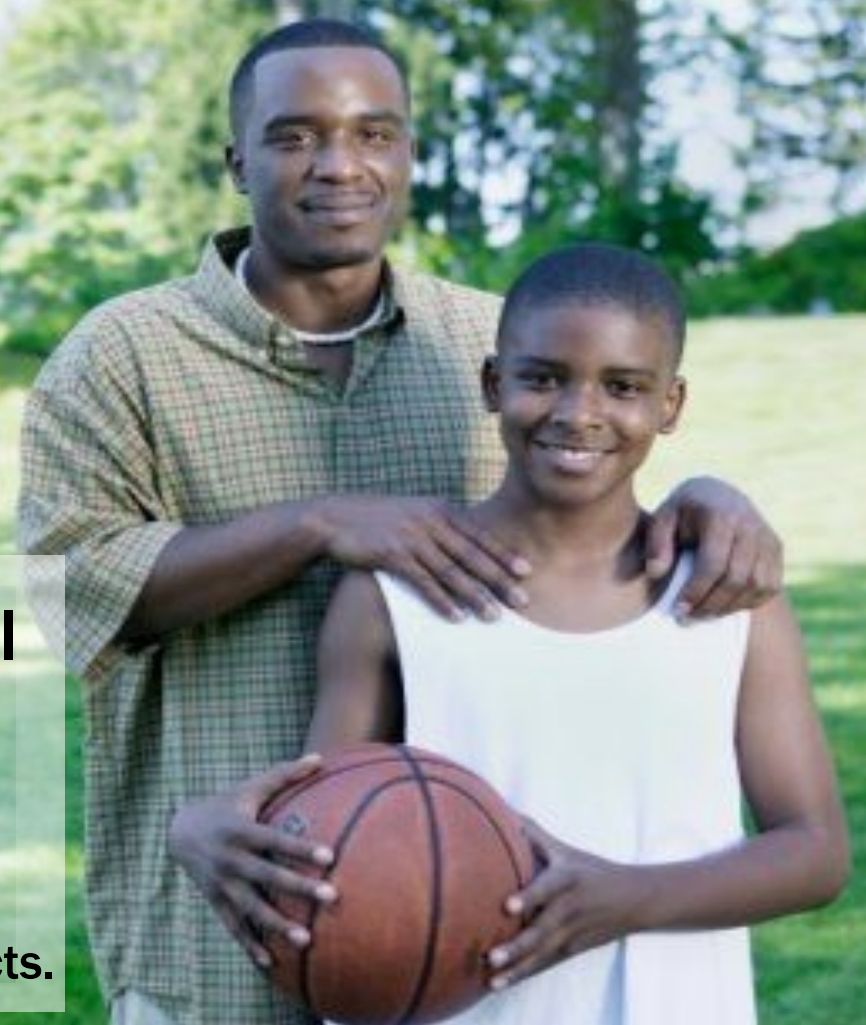

**One in two people will get HPV, which can lead to genital warts and cancer.**

**Learn the facts.**

**The Facts:**

- HPV, or human papillomavirus, is the most common sexually transmitted infection.
- HPV infects both males and females, and causes genital warts and anal, penile, cervical, and throat cancers.
- HPV vaccine reduces genital warts and HPV-related cancers in males and females.

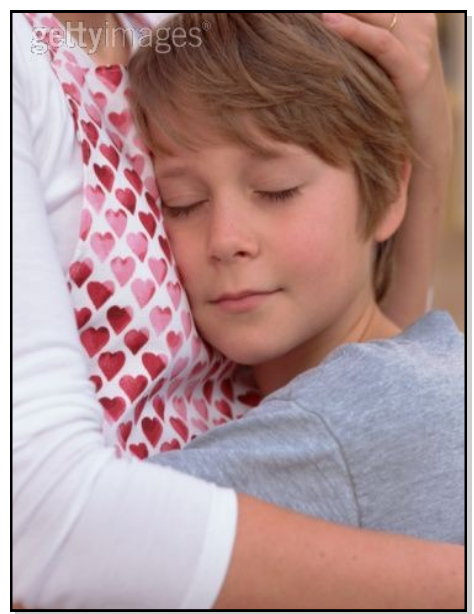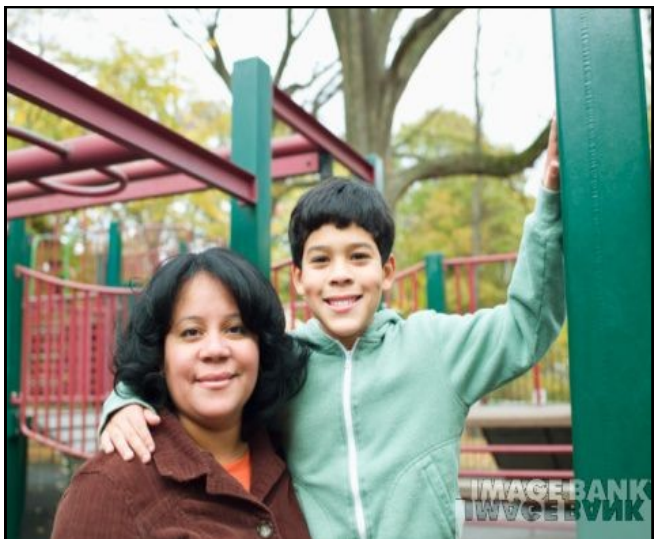

**HPV vaccine is:**

approved for males and females ages 9-26; recommended for boys and girls ages 11-12 before they are sexually active; available at little to no cost through the Vaccines for Children program; and safe and effective.

**Talk to your family doctor, and get your son vaccinated.**
